# Supplementary material
Source: PubMed Central journal article supplement (PMC6322039)
Supplement: AnnalsATS.201710-815OC_rothnie_data_supplement.pdf [file AnnalsATS.201710-815OC_rothnie_data_supplement.pdf]

## Online Data Supplement

### **Myocardial Infarction and Ischaemic Stroke Following Exacerbations of Chronic Obstructive Pulmonary Disease**

Kieran J Rothnie, Olivia Connell, Hana Müllerová, Liam Smeeth, Neil Pearce, Ian Douglas, Jennifer K Quint

**Table S1** Medical codes used to identify myocardial infarction in CPRD.

**Table S2.** Medical codes used to identify ischaemic stroke in CPRD.

**Table S3.** Incidence rate ratios of first myocardial infarction in risk periods after an acute exacerbation of COPD relative to stable periods sensitivity analysis censoring within 6 months of myocardial infarction

**Table S4** Incidence rate ratios of first myocardial infarction in risk periods after an acute exacerbation of COPD relative to stable periods sensitivity analysis censoring within 12 months of myocardial infarction

**Table S5.** Incidence rate ratios of first myocardial infarction in risk periods after an acute exacerbation of COPD relative to stable periods sensitivity analysis censoring within 6 months of ischemic stroke

**Table S6** Incidence rate ratios of first myocardial infarction in risk periods after an acute exacerbation of COPD relative to stable periods sensitivity analysis censoring within 12 months of ischemic stroke

**Table S1** Medical codes used to identify myocardial infarction in CPRD.

| Medical code | Read term                                                  |
|--------------|------------------------------------------------------------|
| 241          | acute myocardial infarction                                |
| 1204         | heart attack                                               |
| 1677         | mi - acute myocardial infarction                           |
| 1678         | inferior myocardial infarction nos                         |
| 5387         | other specified anterior myocardial infarction             |
| 10562        | acute non-st segment elevation myocardial infarction       |
| 12229        | acute st segment elevation myocardial infarction           |
| 14658        | acute myocardial infarction nos                            |
| 14897        | anterior myocardial infarction nos                         |
| 14898        | lateral myocardial infarction nos                          |
| 23892        | posterior myocardial infarction nos                        |
| 29758        | acute transmural myocardial infarction of unspecif site    |
| 32854        | acute posterolateral myocardial infarction                 |
| 34803        | other acute myocardial infarction                          |
| 46017        | other acute myocardial infarction nos                      |
| 63467        | true posterior myocardial infarction                       |
| 96838        | [x]acute transmural myocardial infarction of unspecif site |

**Table S2** Medical codes used to identify ischaemic stroke in CPRD.

| <b>Medical code</b> | <b>Read term</b>                                            |
|---------------------|-------------------------------------------------------------|
| 94482               | [x]cereb infarct due unsp occlus/stenos precerebr arteries  |
| 91627               | [x]cerebrl infarctn due/unspcf occlusn or sten/cerebrl artr |
| 92036               | [x]occlusion and stenosis of other cerebral arteries        |
| 90572               | [x]occlusion and stenosis of other precerebral arteries     |
| 53745               | [x]other cerebral infarction                                |
| 19280               | anterior cerebral artery syndrome                           |
| 32447               | basilar artery occlusion                                    |
| 8443                | brain stem stroke syndrome                                  |
| 25615               | brainstem infarction                                        |
| 15252               | brainstem infarction nos                                    |
| 4240                | carotid artery occlusion                                    |
| 39344               | cereb infarct due cerebral venous thrombosis, nonpyogenic   |
| 40758               | cereb infarct due unsp occlus/stenos precerebr arteries     |
| 5602                | cerebellar infarction                                       |
| 17322               | cerebellar stroke syndrome                                  |
| 8837                | cerebral arterial occlusion                                 |
| 15019               | cerebral embolism                                           |
| 34758               | cerebral embolus                                            |
| 23671               | cerebral infarct due to thrombosis of precerebral arteries  |
| 27975               | cerebral infarction due to embolism of cerebral arteries    |
| 24446               | cerebral infarction due to embolism of precerebral arteries |
| 36717               | cerebral infarction due to thrombosis of cerebral arteries  |
| 3149                | cerebral infarction nos                                     |
| 16517               | cerebral thrombosis                                         |
| 33543               | cerebrl infarctn due/unspcf occlusn or sten/cerebrl artr    |
| 5363                | cva - cerebral artery occlusion                             |
| 40053               | generalised ischaemic cerebrovascular disease nos           |
| 12555               | generalised ischaemic cerebrovascular disease nos           |
| 569                 | infarction - cerebral                                       |
| 57495               | infarction - precerebral                                    |
| 26424               | infarction of basal ganglia                                 |
| 9985                | left sided cerebral infarction                              |
| 18689               | middle cerebral artery syndrome                             |
| 98642               | multiple and bilateral precerebral arterial occlusion       |
| 57527               | occlusion and stenosis of anterior cerebral artery          |
| 55602               | occlusion and stenosis of cerebellar arteries               |
| 51759               | occlusion and stenosis of middle cerebral artery            |
| 65770               | occlusion and stenosis of posterior cerebral artery         |
| 71274               | occlusion+stenosis of multiple and bilat cerebral arteries  |
| 51326               | other precerebral artery occlusion                          |
| 19260               | posterior cerebral artery syndrome                          |
| 45781               | precerebral arterial occlusion                              |
| 71585               | precerebral artery occlusion nos                            |

|       |                                                  |
|-------|--------------------------------------------------|
| 33499 | pure motor lacunar syndrome                      |
| 51767 | pure sensory lacunar syndrome                    |
| 10504 | right sided cerebral infarction                  |
| 6155  | stroke due to cerebral arterial occlusion        |
| 4152  | thrombosis, carotid artery                       |
| 40847 | vertebral artery occlusion                       |
| 73901 | [x]cerebrovascular diseases                      |
| 70536 | acute cerebrovascular insufficiency nos          |
| 10062 | cerebrovascular disease nos                      |
| 47607 | cva - cerebrovascular accident in the puerperium |
| 6116  | cva - cerebrovascular accident unspecified       |
| 1298  | cva unspecified                                  |
| 7780  | left sided cva                                   |
| 37493 | other cerebrovascular disease nos                |
| 34117 | other cerebrovascular disease os                 |
| 51311 | other specified cerebrovascular disease          |
| 12833 | right sided cva                                  |
| 98188 | small vessel cerebrovascular disease             |
| 1469  | stroke and cerebrovascular accident unspecified  |
| 56279 | stroke in the puerperium                         |
| 6253  | stroke unspecified                               |

**Table S3** Incidence rate ratios of first myocardial infarction in risk periods after an acute exacerbation of COPD relative to stable periods sensitivity analysis censoring within six months of myocardial infarction

| <b>Risk period</b>          | <b>N outcome events<br/>(myocardial infarction)</b> | <b>IRR (95% CI)</b> |
|-----------------------------|-----------------------------------------------------|---------------------|
| Total risk period (91 days) | 695                                                 | 1.53 (1.38-1.68)    |
| 1-3 days                    | 73                                                  | 2.68 (2.11-3.41)    |
| 4-7 days                    | 66                                                  | 1.91 (1.48-2.45)    |
| 8-14 days                   | 121                                                 | 2.11 (1.74-2.56)    |
| 15-28 days                  | 172                                                 | 1.80 (1.52-2.12)    |
| 29-91 days                  | 263                                                 | 1.12 (0.97-1.29)    |

**Table S4** Incidence rate ratios of first myocardial infarction in risk periods after an acute exacerbation of COPD relative to stable periods sensitivity analysis censoring within 12 months of myocardial infarction

| <b>Risk period</b>          | <b>N outcome events<br/>(myocardial infarction)</b> | <b>IRR (95% CI)</b> |
|-----------------------------|-----------------------------------------------------|---------------------|
| Total risk period (91 days) | 586                                                 | 1.49 (1.34-1.67)    |
| 1-3 days                    | 59                                                  | 2.48 (1.90-3.25)    |
| 4-7 days                    | 56                                                  | 1.85 (1.41-2.44)    |
| 8-14 days                   | 104                                                 | 2.08 (1.69-2.56)    |
| 15-28 days                  | 138                                                 | 1.67 (1.39-2.01)    |
| 29-91 days                  | 229                                                 | 1.14 (0.98-1.32)    |

**Table S5.** Incidence rate ratios of first ischaemic stroke in risk periods after an acute exacerbation of COPD relative to stable periods sensitivity analysis censoring within 6 months of ischemic stroke

| <b>Risk period</b>          | <b>N outcome events<br/>(myocardial infarction)</b> | <b>IRR (95% CI)</b> |
|-----------------------------|-----------------------------------------------------|---------------------|
| Total risk period (91 days) | 804                                                 | 1. (1.-1.)          |
| 1-3 days                    | 47                                                  | 1.54 (1.15-2.07)    |
| 4-7 days                    | 70                                                  | 1.79 (1.40-2.28)    |
| 8-14 days                   | 119                                                 | 1.80 (1.40-2.28)    |
| 15-28 days                  | 185                                                 | 1.65 (1.41-1.93)    |
| 29-91 days                  | 383                                                 | 1.35 (1.20-1.52)    |

**Table S6.** Incidence rate ratios of first ischaemic stroke in risk periods after an acute exacerbation of COPD relative to stable periods sensitivity analysis censoring within 12 months of ischemic stroke

| <b>Risk period</b>          | <b>N outcome events<br/>(myocardial infarction)</b> | <b>IRR (95% CI)</b> |
|-----------------------------|-----------------------------------------------------|---------------------|
| Total risk period (91 days) | 749                                                 | 1.52 (1.38-1.68)    |
| 1-3 days                    | 43                                                  | 1.53 (1.13-2.08)    |
| 4-7 days                    | 61                                                  | 1.69 (1.31-2.20)    |
| 8-14 days                   | 112                                                 | 1.84 (1.51-2.24)    |
| 15-28 days                  | 170                                                 | 1.64 (1.39-1.94)    |
| 29-91 days                  | 363                                                 | 1.39 (1.24-1.57)    |
